# Supplementary material for: FHL1 Reduces Dystrophy in Transgenic Mice Overexpressing FSHD Muscular Dystrophy Region Gene 1 (FRG1)
Source: PubMed Central journal article supplement (PMC4335040; doi:10.1371/journal.pone.0117665), 2015-02-19

Figure 1A in manuscript

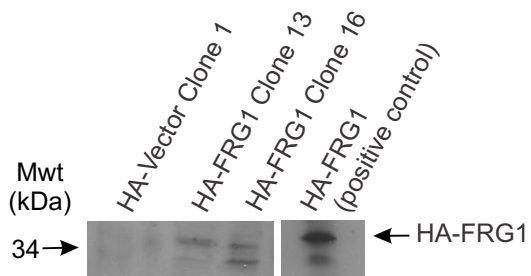

Raw data: FRG1 expression in C2C12-HA-FRG1 myoblasts (clone #13 and #16 were used for further investigation) versus C2C12-HA-vector myoblasts.

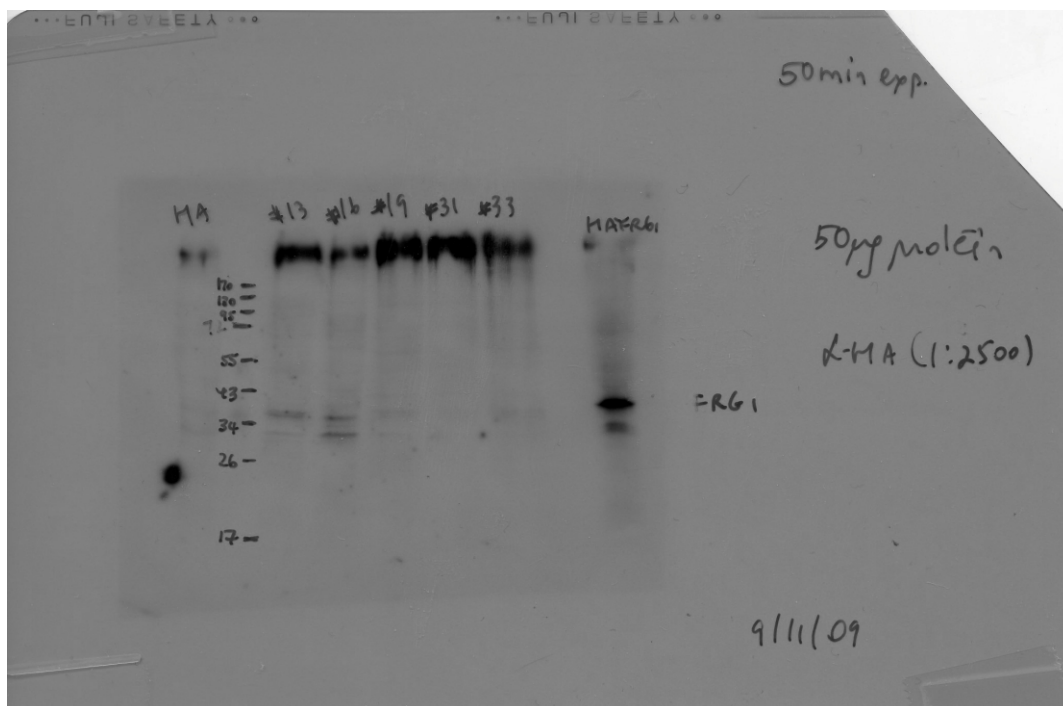

Western blot: HA

Figure 1H in manuscript

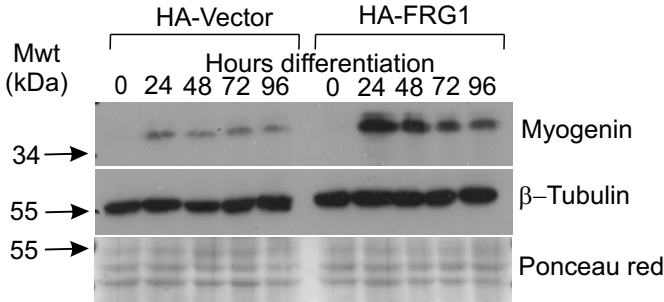

Raw data: myogenin expression in C2C12- HA-vector myoblasts versus C2C12-HA-FRG1 myoblasts

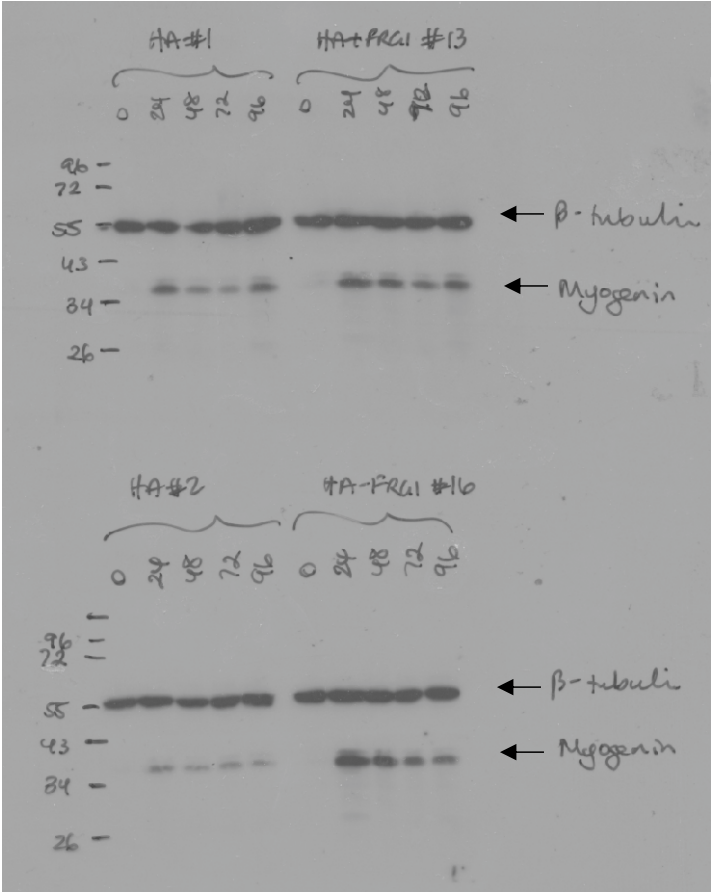

Western blot: myogenin and  $\beta$ -tubulin  
 Membrane was cut horizontally at 43kD protein marker, and top half probed for  $\beta$ -tubulin and bottom half probed for myogenin

Figure 1J in manuscript

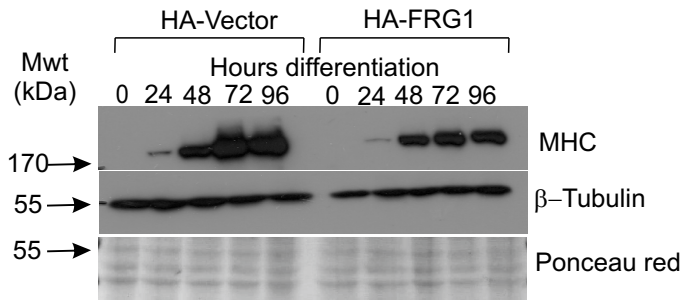

Raw data: dMHC expression in C2C12-HA-vector myoblasts versus C2C12-HA-FRG1 myoblasts

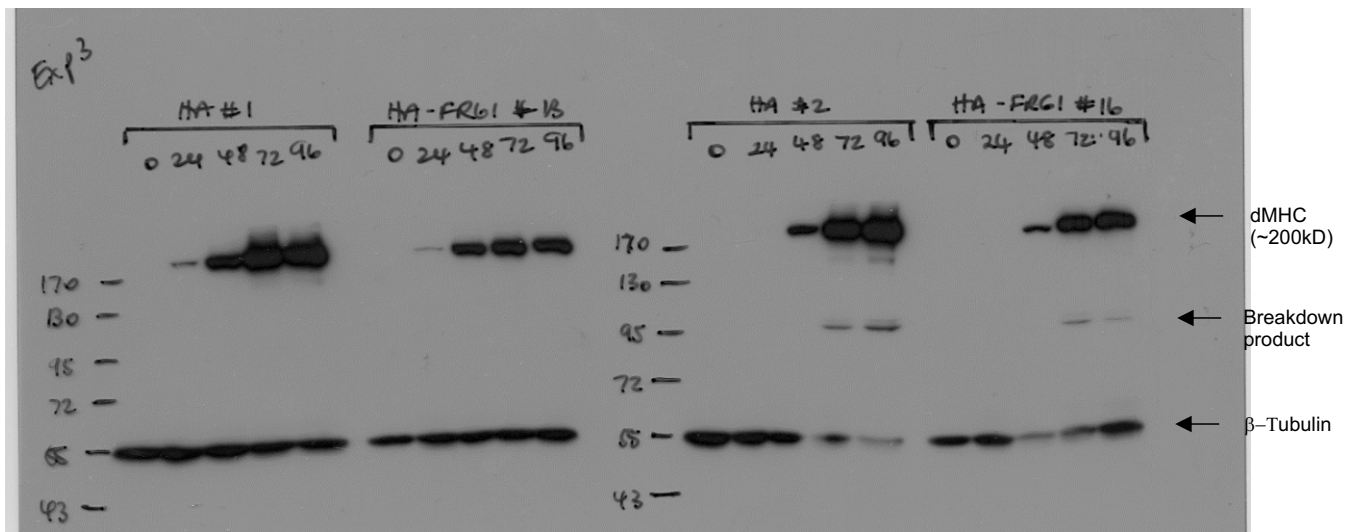

Western blot: dMHC and  $\beta$ -tubulin  
 Membrane cut horizontally at 72kD protein marker, and top portion probed for dMHC and bottom portion probed for  $\beta$ -tubulin.

Figure 2A in manuscript

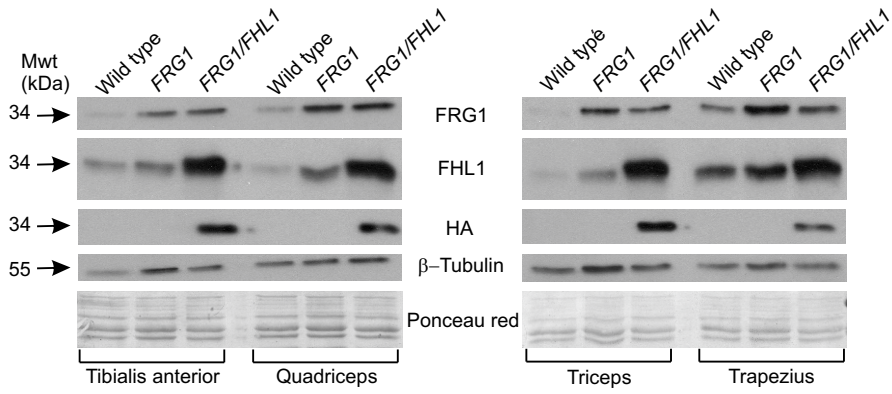

Raw Data - Tibialis anterior and Quadriceps (left panel)

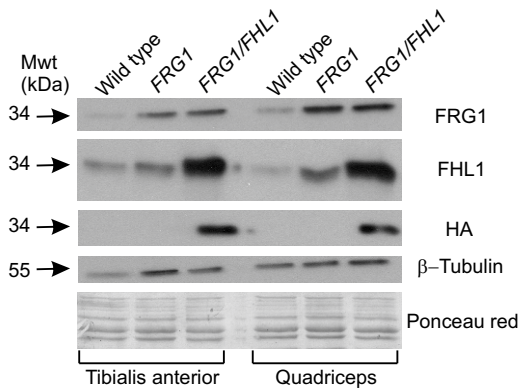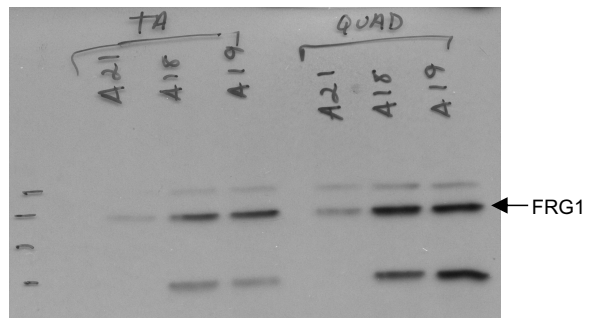

Western blot: FRG1

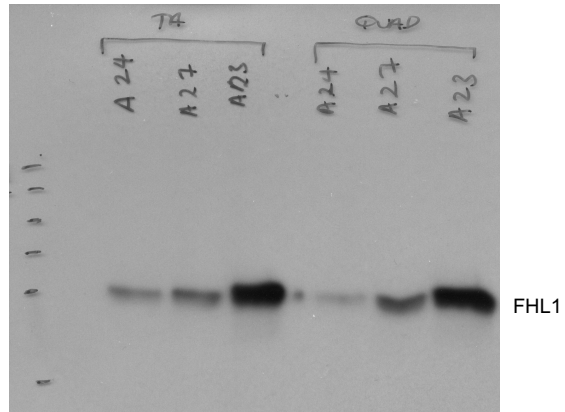

Western blot: FHL1

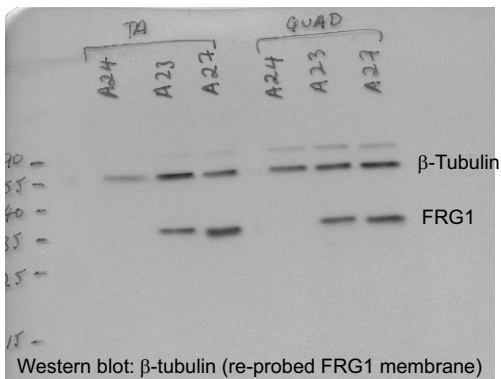

Western blot:  $\beta$ -tubulin (re-probed FRG1 membrane)

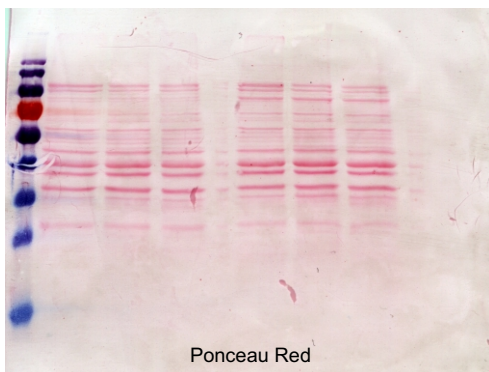

Ponceau Red

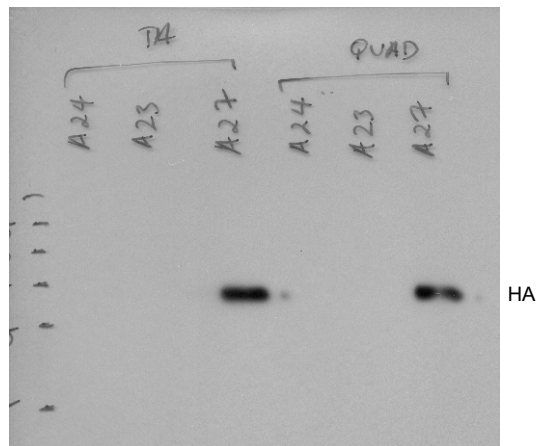

Western blot: HA

Figure 2A in manuscript (Continued)

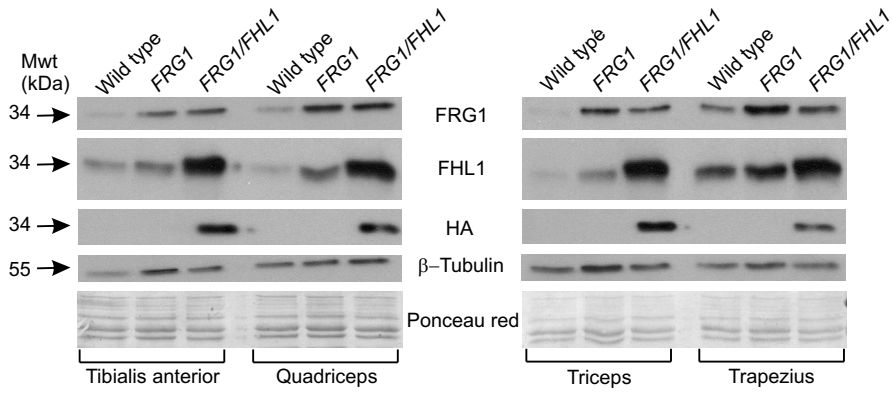

Raw Data - Triceps and Trapezius (right panel)

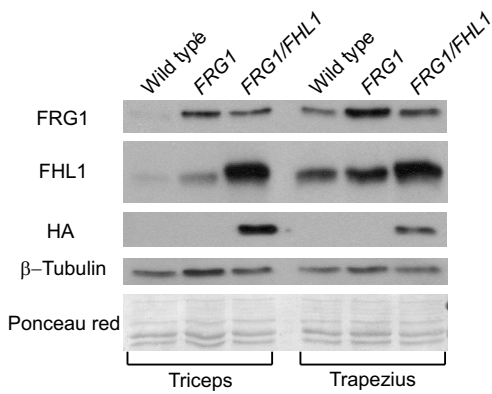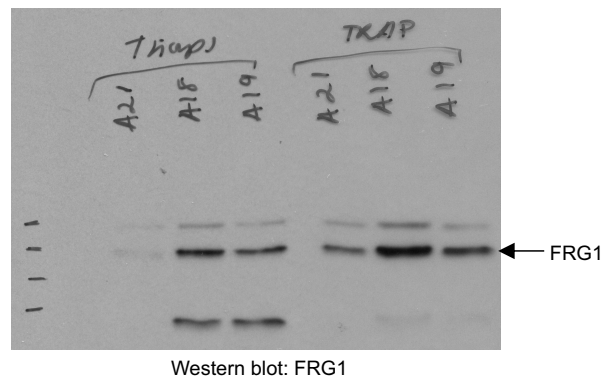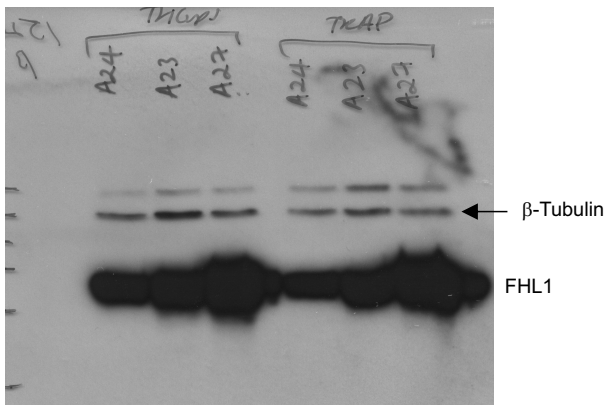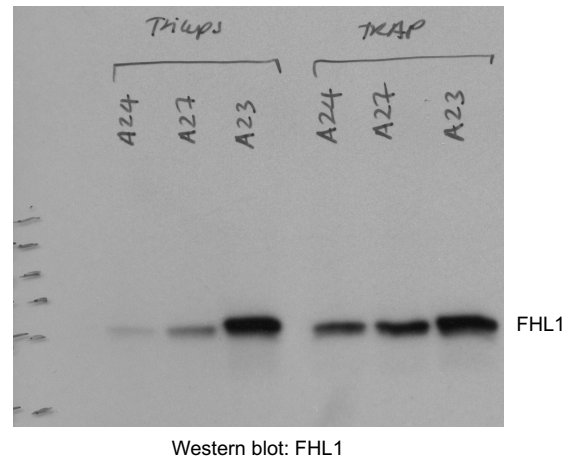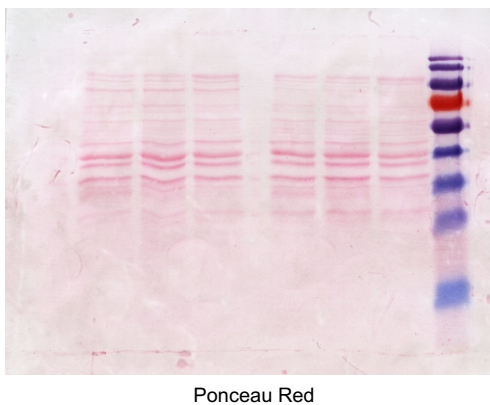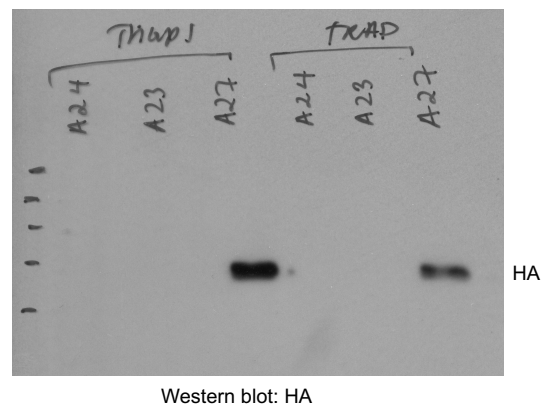

Figure S4 in manuscript

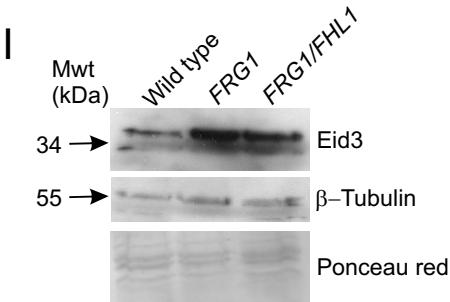

Raw Data

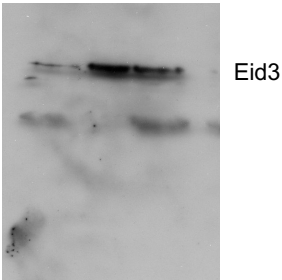

Western blot: Eid3

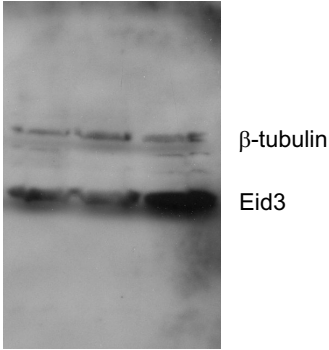

Western blot: β-tubulin (re-probe Eid3 membrane)

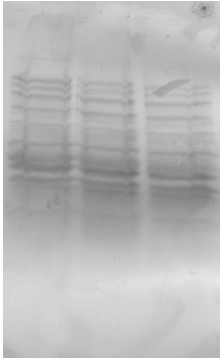

Supplement: pone.0117665.s009.pdf [file pone.0117665.s009.pdf]
